# Supplementary material
Source: PubMed Central journal article supplement (PMC3895336)
Supplement: DS_10.1177_0022034513516631.pdf [file DS_10.1177_0022034513516631.pdf]

Y. Zhang<sup>1</sup>, Y. Song<sup>1</sup>, S. Ravindran<sup>1</sup>, Q. Gao<sup>1</sup>,  
C.C. Huang<sup>1</sup>, A. Ramachandran<sup>1</sup>, A. Kulkarni<sup>2</sup>,  
and A. George<sup>1\*</sup>

<sup>1</sup>Brodie Tooth Development Genetics & Regenerative Medicine Research Laboratory, Department of Oral Biology, University of Illinois at Chicago, Chicago, IL 60612, USA; and <sup>2</sup>NIDCR, NIH, Bethesda, MD, USA; \*corresponding author, anneg@uic.edu

*J Dent Res* DOI: 10.1177/0022034513516631

## APPENDIX

### MATERIALS & METHODS

#### Exosome Isolation from Culture Medium

Supernatant was collected from confluent T4-4 cells and centrifuged at 400 *g* at 4°C for 5 min to remove debris. The cleared supernatants were processed with an Exosome extraction kit (Life Technologies, Grand Island, NY, USA) according to the manufacturer's protocol. The final pellet was re-suspended in 200  $\mu$ L of PBS for immune transmission electron microscopy (TEM) and Western blot analysis.

#### Exosome Staining

Exosomes were mounted on carbon-/formvar-coated nickel grids (Electron Microscopy Sciences, Hartfield, PA, USA) fixed with 4% neutral formalin in PBS for 5 min and washed. They were permeabilized with 0.1% Triton X 100 in PBS and blocked with 5% BSA. Exosomes were labeled with rabbit anti-dentin phosphophoryn (DPP) or anti-CD-63 (Santa Cruz Biotechnology, Santa Cruz, CA, USA). They were washed and incubated with 20 nm gold-conjugated goat anti-rabbit antibody at a 1:100 dilution. The grids were washed and negatively stained with 1% aqueous uranyl acetate and viewed with a JEOL TEM at 80 kV.

**Appendix Table.** Mouse DSPP Primers for Subcloning into pDsRED-GFP and pRF

| Primer                                       | Sequence                                                                            |
|----------------------------------------------|-------------------------------------------------------------------------------------|
| Region 1 72 bp of DSP and 24 bp of DGP       | -forward ATACTAGTGACACCCGAGATGCAGAG<br>-reverse ACGAATTCGTTGGGACCTTCAGTTTC          |
| Region 2 126 bp of DSP and 90 bp of DGP      | -forward GCACTAGTGAAGAAGGCGACAGTACC<br>-reverse ACGAATTCCTCCATTGCTATCTTTACT         |
| Region 3 126 bp of DSP                       | -forward GCACTAGTGAAGAAGGCGACAGTACC<br>-reverse ACGAATTCCTGATCTTGGCTCTTCCCA         |
| Region 4 267 bp of DGP                       | -forward CACTAGTGAATAGAACTGAAGGTCCCAAC<br>-reverse ACGAATTCCTTGCATGGACTCGTC         |
| DSP+DGP (without signal peptide)             | -forward ACTAGTATCCGGTCCCCAGTTAGTACCA<br>-reverse ACGAATTCCTTGCATGGACTCGTC          |
| DSPP (without signal peptide and stop codon) | -forward ACTAGTATCCGGTCCCCAGTTAGTACCA<br>-reverse ACTAGTATCATCACTGGTTGAGTGGTTACTGTC |

DSSP=dentin sialophosphoprotein; DGP= dentin glycoprotein; DSP=dentin sialoprotein.

# DSPP Contains an IRES Element Responsible for the Translation of Dentin Phosphophoryn

## Kidney Capsule Protocol

Mandibular molars were isolated from E13.5 dentin sialophosphoprotein (DSPP) null mouse embryos (a kind gift from Dr. Ashok Kulkarni). They were then enzyme-digested and dissociated into single-cell suspensions. Isolated cells were cultured as single layers in dishes with 10% FBS DMEM media (Song *et al.*, 2006). These cells were transfected with replication-incompetent lentivirus media containing DPP. The transfected cells were pelleted and recombined with the dental epithelium isolated from DSPP knock-out E10.5 mouse embryos.

## Immunohistochemistry

Extracellular matrix (ECM) was isolated as previously published, and immunohistochemical analysis was performed for the localization of DSP and DPP (Ravindran *et al.*, 2012). The experimental protocol used was according to published protocols with anti-DPP (1:200) (rabbit polyclonal) and anti-dentin sialoprotein (DSP), (1:1,000) (monoclonal antibody, a kind gift from Dr. Chunlin Qin).

## APPENDIX REFERENCES

- Ravindran S, Gao Q, Kotecha M, Magin RL, Karol S, Bedran-Russo A, *et al.* (2012). Biomimetic extracellular matrix-incorporated scaffold induces osteogenic gene expression in human marrow stromal cells. *Tiss Eng Part A* 18:295-309.
- Song Y, Zhang Z, Yu X, Yan M, Zhang X, Gu S, *et al.* (2006). Application of lentivirus-mediated RNAi in studying gene function in mammalian tooth development. *Devel Dyn* 235:1334-1344.
